# Supplementary material
Source: publisher site journal article supplement (https://www.dovepress.com/article/356568)
Supplement: Supplementary file 1 [file get_supplementary_file.php]

**Appendix 1: Excluded studies on full text**

| Study                                                                                                                                                                                                                         | Year        | Journal                                         | Reason for exclusion                                          |
|-------------------------------------------------------------------------------------------------------------------------------------------------------------------------------------------------------------------------------|-------------|-------------------------------------------------|---------------------------------------------------------------|
| <p><b>Gundogdu M, Kundakci N, Erdem C. Assessment of Life Quality Index and Treatment Efficacy in Psoriasis Vulgaris Patients Receiving Biologic Therapies in a Turkish Population. <i>Skinmed.</i> 2020;18(2):84-90.</b></p> | <p>2020</p> | <p>Skinmed</p>                                  | <p>Full text unavailable</p>                                  |
| <p><b>Jensen JD, Delcambre MR, Nguyen G, Sami N. Biologic therapy with or without topical treatment in psoriasis: what does the current evidence say? <i>Am J Clin Dermatol.</i> 2014;15(5):379-385.</b></p>                  | <p>2014</p> | <p>American Journal of Clinical Dermatology</p> | <p>No measurement of quality of life when using biologics</p> |
| <p><b>Carretero G, Puig L, Carrascosa JM, et al. Redefining the therapeutic objective in psoriatic patients candidates for biological therapy. <i>J Dermatolog Treat.</i> 2018;29(4):334-346.</b></p>                         | <p>2018</p> | <p>Journal of Dermatological Treatment</p>      | <p>No measurement of quality of life when using biologics</p> |
| <p><b>Navarini AA, French LE. Survival of Second-Line Biologics in Psoriasis: The British BADBIR Registry Data</b></p>                                                                                                        | <p>2018</p> | <p>Journal of Investigative Dermatology</p>     | <p>No measurement of quality of life when using biologics</p> |

|                                                                                                                                                                                                                                                                                                                                                                                                                                                                                                                                                                                                 |             |                                       |                                                               |
|-------------------------------------------------------------------------------------------------------------------------------------------------------------------------------------------------------------------------------------------------------------------------------------------------------------------------------------------------------------------------------------------------------------------------------------------------------------------------------------------------------------------------------------------------------------------------------------------------|-------------|---------------------------------------|---------------------------------------------------------------|
| <p><b>Informs Daily Practice. <i>J Invest Dermatol.</i> 2018;138(4):726-728.</b></p>                                                                                                                                                                                                                                                                                                                                                                                                                                                                                                            |             |                                       |                                                               |
| <p><b>Alten R, Conaghan PG, Strand V, et al. Unmet needs in psoriatic arthritis patients receiving immunomodulatory therapy: results from a large multinational real-world study. <i>Clin Rheumatol.</i> 2019;38(6):1615-1626.</b></p>                                                                                                                                                                                                                                                                                                                                                          | <p>2019</p> | <p>Clin Rheumatology</p>              | <p>No measurement of quality of life when using biologics</p> |
| <p><b>Ellis AG, Flohr C, Drucker AM. Network meta-analyses of systemic treatments for psoriasis: a critical appraisal: Original Articles: Jabbar-Lopez ZK, Yiu ZZN, Ward V et al. Quantitative evaluation of biologic therapy options for psoriasis: a systematic review and network meta-analysis. <i>J Invest Dermatol</i> 2017; 137:1646-54. Sbidian E, Chaimani A, Garcia-Doval I et al. Systemic pharmacological treatments for chronic plaque psoriasis: a network meta-analysis. <i>Cochrane Database Syst Rev</i> 2017; 12:CD011535. <i>Br J Dermatol.</i> 2019;180(2):282-288.</b></p> | <p>2019</p> | <p>British Journal of Dermatology</p> | <p>No measurement of quality of life when using biologics</p> |

|                                                                                                                                                                                                                                                                               |             |                             |                                                               |
|-------------------------------------------------------------------------------------------------------------------------------------------------------------------------------------------------------------------------------------------------------------------------------|-------------|-----------------------------|---------------------------------------------------------------|
| <p><b>Wang Q, Li M, Hu X, Luo Q, Hao P. Autologous blood or autologous serum acupoint injection therapy for psoriasis vulgaris: A protocol for a systematic review and meta-analysis. <i>Medicine (Baltimore)</i>. 2020;99(23):e20555.</b></p>                                | <p>2020</p> | <p>Medicine (Baltimore)</p> | <p>No measurement of quality of life when using biologics</p> |
| <p><b>Kojanova M, Fialova J, Cetkovska P, et al. Demographic data, comorbidities, quality of life, and survival probability of biologic therapy associated with sex-specific differences in psoriasis in the Czech Republic. <i>Dermatol Ther</i>. 2021;34(2):e14849.</b></p> | <p>2021</p> | <p>Dermatologic Therapy</p> | <p>No measurement of quality of life when using biologics</p> |
